# Supplementary material
Source: Springer Nature journal article supplement (https://www.springerprofessional.de/resource/supplementary/13673_2012_41_MOESM7_ESM.pdf/11899370)

**No. of users Vs Time for each access**

**Time in seconds**

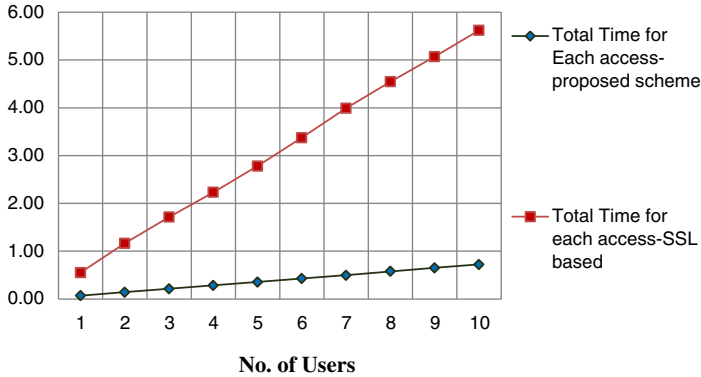

Supplement: MOESM7 [file 11899370]
